# Supplementary material for: Brassinosteroids control root epidermal cell fate via direct regulation of a MYB-bHLH-WD40 complex by GSK3-like kinases
Source: eLife. 2014 Apr 25;3:e02525. doi: 10.7554/eLife.02525 (PMC4005458; doi:10.7554/eLife.02525)
Supplement: Figure 1—source data 1. — DOI: http://dx.doi.org/10.7554/eLife.02525.004 [file elife02525s001.xlsx]

## Sheet: BR-related mutants
	Root hair density, cell length, and relative hair number of the BR-related mutants. Values are means±SD. The two-tailed t test with equal variance or unequal variance was used to determine the significance level of the difference between the wild type and mutant plants. *p<0.05; **p<0.01.
	Genotype	No. of root hairs/mm	Lenth of H cell (mm)	Relative hair No.
	Col-0	24.60 ± 4.11	0.158 ± 0.025	3.89 ± 0.43
	bri1-116	45.85 ± 5.46*	0.102 ± 0.017**	4.67 ± 0.47**
	det2-1	54.08 ± 9.58**	0.088 ± 0.019**	4.75 ± 0.52**
	cpd	42.23 ± 5.40**	0.110 ± 0.024*	4.65 ± 0.54*
	BRI1-OX	20.70 ± 3.87*	0.165 ±0.031	3.40 ±0.46*
	BES1-RNAi	26.04 ± 4.05	0.150 ± 0.028	3.90 ± 0.39
	WS-2	25.67 ± 4.34	0.150 ± 0.026	3.85 ± 0.41
	bin2-3 bil1 bil2	16.72 ± 3.61*	0.171 ± 0.023*	2.86 ± 0.39**

## Sheet: Wild type plants with treatment
	Root hair density, cell length, and relative hair number of the wild type plants treated with eBL, bikinin, Brz, or DMSO. Values are means±SD. The two-tailed t test with equal variance or unequal variance was used to determine the significance level of the difference between the wild type plants treated with various chemicals and mock medium (DMSO). Brz: brassinazole; eBL: epibrassinolide. *p<0.0…
	Treatment	No. of root hairs/mm	Lenth of H cell (mm)	Relative hair No.
	Mock	23.76 ± 3.43	0.160 ± 0.032	3.80 ± 0.45
	100 nM eBL	19.14 ± 2.86*	0.168 ± 0.018	3.22 ± 0.42*
	30 μM bikinin	15.64 ± 3.20*	0.173 ± 0.024*	2.71 ± 0.50**
	1 μM Brz	32.52 ± 2.86**	0.128 ± 0.027*	4.17 ± 0.43*
