# Supplementary material for: Brassinosteroids control root epidermal cell fate via direct regulation of a MYB-bHLH-WD40 complex by GSK3-like kinases
Source: eLife. 2014 Apr 25;3:e02525. doi: 10.7554/eLife.02525 (PMC4005458; doi:10.7554/eLife.02525)
Supplement: Figure 6—source data 1. — DOI: http://dx.doi.org/10.7554/eLife.02525.013 [file elife02525s002.xlsx]

## Sheet: Sheet1
	EGL3 amino acid sequence analysis. The underlined section indicates the HLH domain predicated by SMART (http://smart.embl-heidelberg.de/). Lysine and arginine in the putative non-canonical bipartite-type nuclear localization signal (NLS) motif are highlighted in red. The regions containing the putative phosphorylation sites of BIN2 are highlighted with red bold and italic font.
	MATGENRTVPDNLKKQLAVSVRNIQWSYGIFWSVSASQPGVLEWGDGYYNGDIKTRKTIQAAEVKIDQLGLERSEQLRELYESLSLAESSASGSSQVTRRASAAALSPEDLTDTEWYYLVCMSFVFNIGEGIPGGALSNGEPIWLCNAETADSKVFTRSLLAKSASLQTVVCFPFLGGVLEIGTTEHIKEDMNVIQSVKTLFLEAPPYTTISTRSDYQEIFDPLSDDKYTPVFITEAFPTTSTSGFEQEPEDHDSFINDGGASQVQSWQFVGEEISNCIHQSLNSSDCVSQTFVGTTGRLACDPRKSRIQRLGQIQEQSNHVNMDDDVHYQGVISTIFKTTHQLILGPQFQNFDKRSSFTRWKRSSSVKTLGEKSQKMIKKILFEVPLMNKKEELLPDT…
