# Supplementary material for: Brassinosteroids control root epidermal cell fate via direct regulation of a MYB-bHLH-WD40 complex by GSK3-like kinases
Source: eLife. 2014 Apr 25;3:e02525. doi: 10.7554/eLife.02525 (PMC4005458; doi:10.7554/eLife.02525)
Supplement: Supplementary file 1. — List of primers used in this study. DOI: http://dx.doi.org/10.7554/eLife.02525.020 [file elife02525s003.xlsx]

## Sheet: Sheet1
Primer Name	Sequence (5'-3')	Note
wer-1F	CGAGCAAGAAGAGGCTCTTATC	To genotype wer-1 (Mbo І can cut the wer-1F/wer-1R PCR product in homozygous wer-1)
wer-1R	CTCTGTTTGGTTTTCTGCTCTTTG
BIN2-106F	CGCGGGATCCATGGCTGATGATAAGGAGA	To construct BIN2-pXY106 and BIN2-His vectors
BIN2-106R	ACGCGTCGACTTAAGTTCCAGATTGATTC
EGL3-104F	CGGGATCCATGGCAACCGGAGAAAACAGAAC	To construct EGL3-GFP, EGL3-pXY104, EGL3-MBP, and EGL3-GST vectors
EGL3-104R	CGCGTCGACACATATCCATGCAACCCTTTGAAG
WER-104F	CGGGATCCATGAGAAAGAAAGTAAGTAGTAGTGG	To construct WER-pXY104, WER-GST, and WER-MBP vectors
WER-104R	ACGCGTCGACAAAACAGTGTCCATCTATAAAGT
EGL3-proF	CGGAATTCGTCCAATGCATTAGAAGTACTGTCCAG	To amplify EGL3 promoter region
EGL3-proR	GGGGTACCTGTTTCTTCATCCCCATGTAACAAA
EGL3-T399AF	GTTGTTACCGGACGCACCAGAGGAAAC	To amplify EGL3T399A mutation region
EGL3-T399AR	GTTTCCTCTGGTGCGTCCGGTAACAAC
EGL3-T403AF	CACCAGAGGAAGCCGGGAACCATG	To amplify EGL3T403A mutation region
EGL3-T403AR	CATGGTTCCCGGCTTCCTCTGGTG
EGL3-T9903AF	GTTACCGGACGCACCAGAGGAAGCCGGGAACCATG	To amplify EGL3T399A/T403A mutation region
EGL3-T9903AR	CATGGTTCCCGGCTTCCTCTGGTGCGTCCGGTAAC
EGL3-T209AF	GCTCCTCCATATGCTACAATATCGAC	To amplify EGL3T209A mutation region
EGL3-T209AR	GTCGATATTGTAGCATATGGAGGAGC
EGL3-T213AF	CTACAATATCGGCAAGATCAGAC	To amplify EGL3T213A mutation region
EGL3-T213AR	GTCTGATCTTGCCGATATTGTAG
EGL3-T0913AF	CTCCTCCATATGCTACAATATCGGCAAGATCAGACT	To amplify EGL3T213A mutation region
EGL3-T0913AR	AGTCTGATCTTGCCGATATTGTAGCATATGGAGGAG
BIN2-ADF	ACGCGTCGACCATGGCTGATGATAAGGAGAT	To construct BIN2-pAD502 vector for yeast two-hybrid
BIN2-ADR	ATATGCGGCCGCTTAAGTTCCAGATTGATTCA
EGL3-DBF	ACGCGTCGACGATGGCAACCGGAGAAAACAGAACG	To construct EGL3-pDBLeu vector for yeast two-hybrid
EGL3-DBR	GGACTAGTTTAACATATCCATGCAACCCTTTGAAG
TTG1-MBPF	GCTCTAGAATGGATAATTCAGCTCCAGATTCGT	To construct TTG1-MBP, TTG1-pXY104, TTG1-GST and TTG1-GFP vectors
TTG1-MBPR	ACGCGTCGACAACTCTAAGGAGCTGCATTTTG
CPC-MBPF	GCTCTAGAATGTTTCGTTCAGACAAGGCG	To construct CPC-MBP, CPC-pXY104 and CPC-GST vectors
CPC-MBPR	ACGCGTCGACTTTCCTAAAAAAGTCTCTTCGTC
WER-DBF	ACGCGTCGACGATGAGAAAGAAAGTAAGTAGTAGTGGTG	To construct WER-pDBLeu vector for yeast two-hybrid
WER-DBR	GGACTAGTTCAAAAACAGTGTCCATCTATAAAGT
CPC-DBF	ACGCGTCGACGATGTTTCGTTCAGACAAGGCG	To construct CPC-pDBLeu vector for yeast two-hybrid
CPC-DBR	GGACTAGTTCATTTCCTAAAAAAGTCTCTTCGTC
TTG1-DBF	ACGCGTCGACGATGGATAATTCAGCTCCAGATTCGT	To construct TTG1-pDBLeu vector for yeast two-hybrid
TTG1-DBR	GGACTAGTTCAAACTCTAAGGAGCTGCATTTTG
